# Supplementary material
Source: PubMed Central journal article supplement (PMC7799329)
Supplement: suppli_data_2_bbaa340.pdf [file suppli_data_2_bbaa340.pdf]

## 1. Toxicity prediction along with all the important physico-chemical properties like hydrophobicity, charge pl etc. of peptides

| Peptide ID | Peptide Sequence | SVM Score | Prediction | Hydrophobicity | Steric hindrance | Sidebulk | Hydropathicity | Amphipathicity | Hydrophilicity | Net Hydrogen | Charge | pI    | Mol wt  |
|------------|------------------|-----------|------------|----------------|------------------|----------|----------------|----------------|----------------|--------------|--------|-------|---------|
| 1          | LTDEMIQY         | -0.52     | Non-Toxin  | -0.05          | 0.65             | 0.65     | -0.06          | 0.28           | -0.21          | 0.67         | -2.00  | 3.67  | 1083.35 |
| 2          | WTAGAAAYY        | -1.07     | Non-Toxin  | 0.15           | 0.58             | 0.58     | 0.29           | 0.00           | -1.16          | 0.44         | 0.00   | 5.87  | 973.16  |
| 3          | WMESEFRVY        | -1.68     | Non-Toxin  | -0.16          | 0.66             | 0.66     | -0.62          | 0.55           | -0.19          | 1.00         | -1.00  | 4.54  | 1246.52 |
| 4          | FVSNQTHWF        | -0.92     | Non-Toxin  | 0.09           | 0.57             | 0.57     | 0.03           | 0.16           | -1.14          | 0.67         | 0.50   | 7.10  | 1094.32 |
| 5          | IRASANLAA        | -0.80     | Non-Toxin  | -0.04          | 0.59             | 0.59     | 0.74           | 0.27           | -0.23          | 0.78         | 1.00   | 10.11 | 886.13  |
| 6          | FGAISSVLN        | -0.80     | Non-Toxin  | 0.18           | 0.63             | 0.63     | 1.29           | 0.00           | -0.81          | 0.44         | 0.00   | 5.88  | 907.16  |
| 7          | VKQLSSNFG        | -0.89     | Non-Toxin  | -0.12          | 0.64             | 0.64     | -0.23          | 0.55           | -0.20          | 0.89         | 1.00   | 9.11  | 979.23  |
| 8          | FAMQMAYRF        | -1.23     | Non-Toxin  | -0.02          | 0.67             | 0.67     | 0.41           | 0.41           | -0.86          | 0.78         | 1.00   | 9.10  | 1164.52 |
| 9          | FGAGAALQ         | -0.46     | Non-Toxin  | 0.19           | 0.60             | 0.60     | 0.96           | 0.16           | -0.70          | 0.25         | 0.00   | 5.88  | 733.93  |
| 10         | LTPGDSSSGWTAG    | -0.78     | Non-Toxin  | -0.02          | 0.57             | 0.57     | -0.42          | 0.00           | -0.20          | 0.54         | -1.00  | 3.80  | 1235.45 |
| 11         | YGFQPTNGVGYQ     | -1.24     | Non-Toxin  | -0.05          | 0.65             | 0.65     | -0.80          | 0.21           | -0.70          | 0.75         | 0.00   | 5.87  | 1330.60 |
| 12         | VITPGTNTSN       | -1.32     | Non-Toxin  | -0.07          | 0.61             | 0.61     | -0.32          | 0.00           | -0.38          | 0.80         | 0.00   | 5.88  | 1003.22 |
| 13         | QTQTNSPRRARS     | -1.22     | Non-Toxin  | -0.67          | 0.60             | 0.60     | -2.23          | 0.82           | 0.74           | 1.83         | 3.00   | 12.31 | 1401.66 |

2. AlgPred Prediction: **NON ALLERGEN**, Prediction based on SVM method based on dipeptide composition : **NON ALLERGEN**, Blast RESULT: **NON ALLERGEN**  
 Prediction by Hybrid Approach: **NON ALLERGEN**, MAST Result: **NON ALLERGEN**, Over All Allergenic Result: **NON ALLERGEN**.
